# Supplementary material
Source: PubMed Central journal article supplement (PMC8482303)
Supplement: jama-e2116628-s003.pdf [file jama-e2116628-s003.pdf]

## Data Sharing Statement

Andersen. Effect of Vasopressin and Methylprednisolone vs Placebo on Return of Spontaneous Circulation in Patients With In-Hospital Cardiac Arrest. *JAMA*. Published September 29, 2021. doi:10.1001/jama.2021.16628

### Data

**Data available:** Yes

**Data types:** Deidentified participant data, Data dictionary

**How to access data:** All relevant trial-related documents, including the protocol, data dictionary, and the main statistical code, will be shared along with the data. There will be no predetermined end date for the data sharing. Data will be available for any research purpose to all interested parties who have approval from an independent review committee and who have a methodological sound proposal as determined by the steering committee of the current trial. Only the methodological qualities and not the purpose or objective of the proposal will be considered. Interested parties will be able to request the data by contacting the principal investigator.

**When available:** Six months after the publication of the last results.

### Supporting Documents

**Document types:** None

### Additional Information

**Who can access the data:** As above.

**Types of analyses:** As above.

**Mechanisms of data availability:** As above.
